# Development of a Real-Time Fluorescence Loop-Mediated Isothermal Amplification Assay for Rapid and Quantitative Detection of *Fusarium oxysporum* f. sp. *ubense* Tropical Race 4 In Soil

Xin Zhang<sup>1,2</sup>, He Zhang<sup>1,2</sup>, Jinji Pu<sup>1</sup>, Yanxiang Qi<sup>1</sup>, Qunfang Yu<sup>1</sup>, Yixian Xie<sup>1</sup>, Jun Peng<sup>1,2\*</sup>

**1** Ministry of Agriculture Key Laboratory of Integrated Pest Management on Tropical Crops, Environmental and Plant Protection Institute, Chinese Academy of Tropical Agricultural Sciences, Haikou, China, **2** State Key Laboratory of Agro-biotechnology and Ministry of Agriculture Key Laboratory for Plant Pathology, China Agricultural University, Beijing, China

## Abstract

*Fusarium oxysporum* f. sp. *ubense* (Foc), the causal agent of Fusarium wilt (Panama disease), is one of the most devastating diseases of banana (*Musa* spp.). The Foc tropical race 4 (TR4) is currently known as a major concern in global banana production. No effective resistance is known in *Musa* to Foc, and no effective measures for controlling Foc once banana plants have been infected in place. Early and accurate detection of Foc TR4 is essential to protect banana industry and guide banana planting. A real-time fluorescence loop-mediated isothermal amplification assay (RealAmp) was developed for the rapid and quantitative detection of Foc TR4 in soil. The detection limit of the RealAmp assay was approximately 0.4 pg/μl plasmid DNA when mixed with extracted soil DNA or 10<sup>3</sup> spores/g of artificial infested soil, and no cross-reaction with other relative pathogens were observed. The RealAmp assay for quantifying genomic DNA of TR4 was confirmed by testing both artificially and naturally infested samples. Quantification of the soil-borne pathogen DNA of Foc TR4 in naturally infested samples was no significant difference compared to classic real-time PCR ( $P>0.05$ ). Additionally, RealAmp assay was visual with an improved closed-tube visual detection system by adding SYBR Green I fluorescent dye to the inside of the lid prior to amplification, which avoided the inhibitory effects of the stain on DNA amplification and makes the assay more convenient in the field and could thus become a simple, rapid and effective technique that has potential as an alternative tool for the detection and monitoring of Foc TR4 in field, which would be a routine DNA-based testing service for the soil-borne pathogen in South China.

**Citation:** Zhang X, Zhang H, Pu J, Qi Y, Yu Q, et al. (2013) Development of a Real-Time Fluorescence Loop-Mediated Isothermal Amplification Assay for Rapid and Quantitative Detection of *Fusarium oxysporum* f. sp. *ubense* Tropical Race 4 In Soil. PLoS ONE 8(12): e82841. doi:10.1371/journal.pone.0082841

**Editor:** Zhengguang Zhang, Nanjing Agricultural University, China

**Received:** April 15, 2013; **Accepted:** November 7, 2013; **Published:** December 20, 2013

**Copyright:** © 2013 Zhang et al. This is an open-access article distributed under the terms of the Creative Commons Attribution License, which permits unrestricted use, distribution, and reproduction in any medium, provided the original author and source are credited.

**Funding:** Central Nonprofit Scientific Research Institutes for Basic Scientific Research Special Fund (1630042013021). The funders had no role in study design, data collection and analysis, decision to publish, or preparation of the manuscript.

**Competing Interests:** The authors have declared that no competing interests exist.

\* E-mail: swaupj2@126.com

These authors contributed equally to this work.

## Introduction

Fusarium wilt of banana (Panama disease), caused by the soil-borne fungus *Fusarium oxysporum* f. sp. *ubense* (Foc), is a serious disease in banana (*Musa* spp.) production worldwide [1–3]. Foc can affect species of *Musa* and *Heliconia*, and strains have been classified into four physiological races. Race 1 is pathogenic to ‘Gros Michel’ (AAA) and ‘Silk’ (AAB) [4]; Race 2 affects only the hybrid triploid Bluggoe (ABB) [5], and race 4 attacks Cavendish cultivars and all cultivars susceptible to races 1 and 2, which is considered the most important because it affects cultivars that produce more than 80% of the world’s bananas [3,6]. The race 4 isolates were subdivided into subtropical race 4 (ST4) and tropical race 4 (TR4). The ST4 isolates cause disease in Cavendish bananas in the subtropics [6–8], and TR4 isolates are pathogenic both under tropical and subtropical conditions [9–12]. In South China, Fusarium wilt of Xiang Jiao (AAA, Cavendish bananas)

was first reported in Guangdong Province in 2001 [13], which caused by TR4 [14].

To the best of our knowledge, there are currently no fungicides available to control Fusarium wilt of banana once plants were infected. Chemical control is difficult because the chlamydo-spores can survive in the soil. The best option is planting resistant cultivars, such as Fusarium wilt-resistant bananas selected via genetic variability from tissue [15], and transgenic bananas [16,17]. However, Fusarium wilt of banana is still a major threat to banana production worldwide. Quarantine policies and Foc-free tissue culture planting materials are the important approaches to prevent disease spreading [18]. Therefore, it is necessary to develop an efficient and reliable technique to detect Foc in soil before bananas are planted.

The real-time PCR is applied widely for a number of soil-borne plant pathogens, such as *Helminthosporium solani* [19], *Colletotrichum coccodes* [20,21], *Pythium* spp. [22], *Polymyxa graminis* [23], *Rhizoctonia solani* [24], *Verticillium dahliae* [25], *Phytophthora infestans* [26],

*Plasmidiophora brassicae* [27], *Fusarium oxysporum* f. sp. *lycopersici* and differential determination of its races [28].

Apart from classic real-time PCR widely used in quantitative detection of soil-borne pathogens, an alternative technique termed loop-mediated isothermal amplification (LAMP) is also available used for quantitative analysis. The LAMP assay is performed under isothermal conditions and employs a DNA polymerase with strand-displacement activity. A set of four specially designed primers, which recognize a total of six distinct sequences on the target DNA, are used to amplify the product. The amplicons contain single-stranded loops, allowing primers to bind without the need for repeated cycles of thermal denaturation [29,30]. As the LAMP reaction progresses, the by-product pyrophosphate ion forms a white precipitate of magnesium pyrophosphate. The increase in the turbidity due to the production of white precipitate correlates with the amount of DNA synthesized. Various other detection formats can be used as well. Positive LAMP reaction can be visualized with the naked eye by adding DNA-intercalating dyes such as ethidium bromide, SYBR Green I, propidium iodide and Quant-iT PicoGreen, or metal-ion indicators such as hydroxynaphthol blue (HNB) [31],  $\text{CuSO}_4$  [32] and calcein [33]. The generation of LAMP products can also be monitored in real-time by measuring the increase in turbidity deriving from magnesium pyrophosphate formation to infer increases in amplified DNA concentration, allowing quantitative detection of the target [34–37]. Lately, the detection of amplified products through fluorescence dye with an ESE-Quant tube scanner was developed. The method doesn't need expensive equipment or reagents, and is a more simple and cost-effective technology, compared to other DNA-based tests [38,39].

Several PCR-based assays were developed to detect Foc race 4 *in planta* and are distinguishable for Foc race 4 from non-Foc race 4 isolates [40–42]. Recently, real-time PCR [43] and loop-mediated isothermal amplification assay (LAMP) have been developed to detect the Foc race 4 in banana tissues [44]. Although these established methods could detect the Foc isolates in plant tissues, Foc is a soil-borne pathogen that can survive in soil and is hardly to control once banana plants were infected.

Thus, with the aim of developing effective control strategies, accurate and reliable methods for detecting and quantifying the pathogens in soil are required. The objectives of this study were to develop a Foc TR4 specific RealAmp assay, and to use this assay as a quantitative measure for direct detection of Foc TR4 in naturally infested soil samples. The feasibility of the LAMP-based quantitative detection assay was verified by testing both artificially and naturally infested soil samples in comparison to classic real-time PCR method. Additionally, the RealAmp products were also detected directly by visual observation with an improved closed-tube detection system by adding the SYBR Green I fluorescent dye to the inside of the lid prior to amplification, which is a more convenient diagnostics in filed surveys.

## Materials and Methods

No specific permits were required for the described field studies in the manuscript. The fields are located in suburb of urban districts in South China, which are used for banana growing. The locations are not privately-owned or protected in any way. The field study is about banana and its one of pathogens *Fusarium oxysporum* f. sp. *cubense*. They are not endangered or protected species.

## Source of Isolates

*F. oxysporum* isolates, and other isolates used in this study are listed in Table 1. A single spore culture of each tested isolate was grown on a Nash-PCNB plate (1.5% peptone, 2% agar, 0.1%  $\text{KH}_2\text{PO}_4$ , 0.05%  $\text{MgSO}_4 \cdot 7\text{H}_2\text{O}$ , 0.1% pentachloronitrobenzene, 0.03% streptomycin and 0.1% neomycin). The isolates were maintained in a collection at the Institute of Environmental and Plant Protection, Chinese Academy of Tropical Agricultural Sciences, PR China.

## Mycelium and Microconidia Preparation

For genomic DNA extraction, 10 pieces of agar culture (ca.  $1 \times 1 \times 2$  mm) obtained from the margin of 3-day-old colonies growing on potato dextrose agar (PDA) plates were placed in 100 ml of potato dextrose broth (PDB, 20 g glucose and 200 g potato extract in 1 L  $\text{H}_2\text{O}$ ) medium in a 250-ml flask. After incubation in the dark at  $25^\circ\text{C}$  on a shaker for 6 days, the mycelia were collected on filter paper and stored at  $-70^\circ\text{C}$  until use. Microconidia of the fungus Foc TR4 were prepared by growing plate cultures on PDA at  $25^\circ\text{C}$  for 10 days in darkness. Microconidia were harvested from the plates by rubbing the surface mycelium gently with a rubber swab and collecting the spores in distilled water. Hyphal debris was removed from the spores by centrifuging the crude spore preparation through a 40% sucrose pad, with the spores settling to the bottom of the tube and the rest of the cellular debris remaining on the surface of the

**Table 1.** Fungal species and isolates used to test the specificity of the RealAmp assay.

| Species/isolates                                       | Original hosts             | Origin                  |
|--------------------------------------------------------|----------------------------|-------------------------|
| <i>Fusarium oxysporum</i> f. sp. <i>cubense</i> race 1 | Banana ( <i>Musa</i> spp.) | ACCC*31277              |
| <i>F. oxysporum</i> f. sp. <i>cubense</i> ST4          | Banana                     | ACCC31276               |
| <i>F. oxysporum</i> f. sp. <i>cubense</i> TR4          | Banana                     | ACCC31272               |
| <i>F. oxysporum</i> f. sp. <i>cubense</i>              | Banana                     | ACCC31273               |
| <i>Curvularia lunata</i>                               | Banana                     | ACCC36365               |
| <i>Colletotrichum gloeosporioides</i>                  | Banana                     | ACCC31244               |
| <i>Alternaria alternata</i>                            | Banana                     | ACCC37607               |
| <i>Cordana musae</i>                                   | Banana                     | ACCC36965               |
| <i>Corynespora cassicola</i>                           | Rubber tree                | CFCC <sup>†</sup> 82971 |
| <i>Mycosphaerella fijiensis</i>                        | Banana                     | ACCC31400               |
| <i>F. oxysporum</i> f. sp. <i>cubense</i>              | Banana                     | ACCC31271               |
| <i>Mycosphaerella fijiensis</i>                        | Banana                     | ACCC31409               |
| <i>F. oxysporum</i> f.sp. <i>niveum</i>                | Watermelon                 | ACCC30024               |
| <i>F. oxysporum</i> f. sp. <i>cubense</i> race 1       | Banana                     | ACCC31275               |
| <i>F. oxysporum</i> f. sp. <i>cucumerium</i>           | Cucumber                   | ACCC30220               |
| <i>F. oxysporum</i> f. sp. <i>vasinfectum</i>          | Cotton                     | ACCC30223               |
| <i>F. oxysporum</i> f. sp. <i>pisi</i>                 | Pea                        | ACCC31037               |
| <i>Fusarium oxysporum</i> f.sp. <i>vasinfectum</i>     | Cotton                     | ACCC 36879              |
| <i>Fusarium oxysporum</i> f.sp. <i>vasinfectum</i>     | Cotton                     | ACCC 36887              |
| <i>Fusarium oxysporum</i>                              | Vanilla                    | ACCC31306               |
| <i>F. oxysporum</i> f.sp. <i>niveum</i>                | Watermelon                 | ACCC 36173              |
| <i>Fusarium solani</i>                                 | Smoke tree                 | CFCC82471               |
| <i>Verticillium dahliae</i>                            | Cotton                     | ACCC36204               |

\*ACCC is Agricultural Culture Collection of China; <sup>†</sup>CFCC is China Forestry Culture Collection Center.

doi:10.1371/journal.pone.0082841.t001



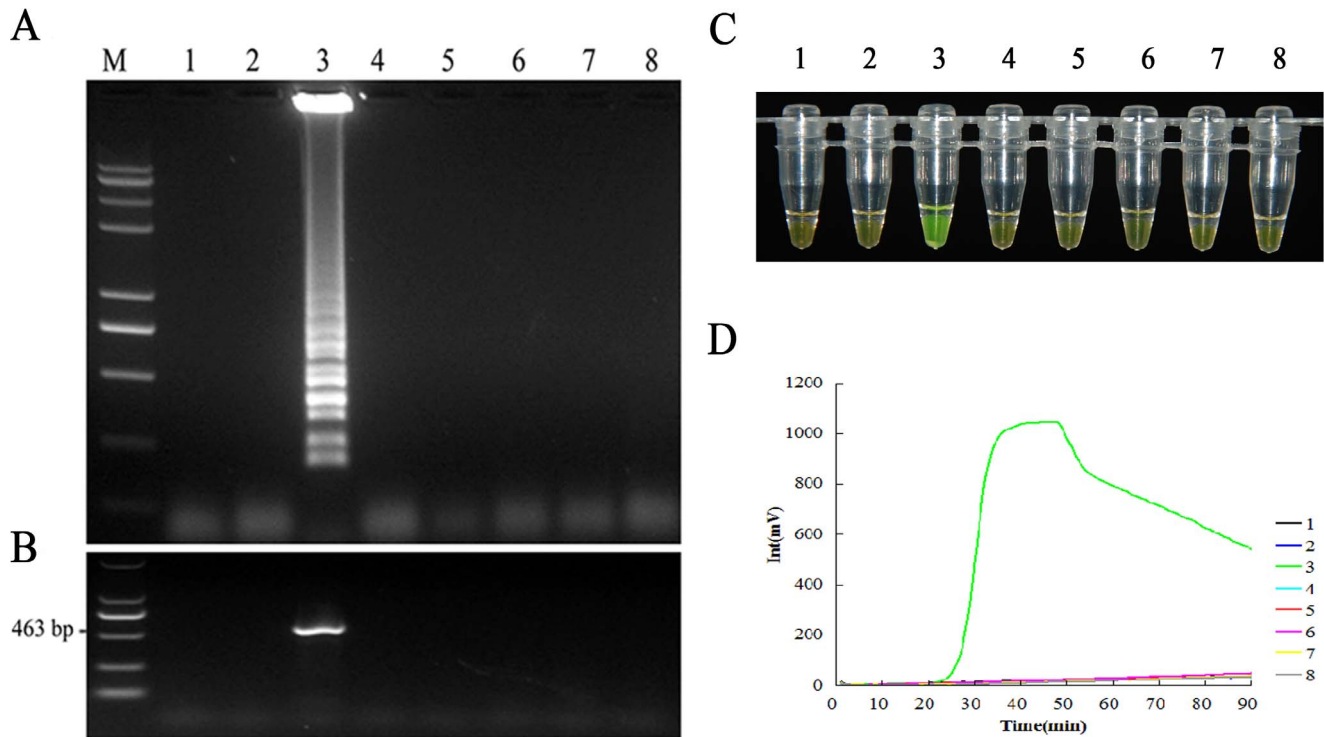

**Figure 2. Specificity test of the real-time fluorescence loop mediated isothermal amplification assay (RealAmp assay) for the detection of Foc TR4.** (A) Agarose gel electrophoresis analysis of RealAmp assay amplicon showing the specificity of RealAmp assay for detection of Foc TR4. Lanes 1–3, genomic DNAs of *Fusarium oxysporum* f. sp. *ubense* (Foc) race 1, subtropical race 4 (ST4) and tropical race 4 (TR4), respectively; Lanes 4–8, the DNAs of *Mycosphaerella melonis*, *Fusarium oxysporum* f. sp. *cucumerium*, *Fusarium oxysporum* f. sp. *luffae*, and *Fusarium oxysporum* f. sp. *niveum*, respectively; Lane M, Trans2K plus II DNA marker. Samples shown in lanes 1 to 8 in Fig. 2B, 2C and 2D is the same as in Fig. 2A. (B) The specificity of RealAmp assay was validated by specific PCR amplification using the specific FocTR4-F/FocTR4-R primer set. (C) Visual inspection of the RealAmp amplification products. The original orange colour of SYBR green turned green in the positive reaction mixture. (D) The fluorescence units vs. time graph plotted automatically by the ESE-Quant Tube Scanner. The graph reports the fluorescence in millivolts (mV) on the y axis and time in minutes on the x axis. Results can be read in the LCD panel as either positive or negative and/or in real time using a computer with the appropriate software.

doi:10.1371/journal.pone.0082841.g002

1720) served as outer primer and used for the initiation of LAMP reaction [41]. All the primers were purified by HPLC (Sangon Biotec, Shanghai, China). The primer sequences and their respective binding sites were indicated in Fig. 1. The primer specificity was checked using the basic local alignment search tool (BLAST) against human DNA and other fungi sequences in the nonredundant GenBank database. Additionally, the sequences from various *formae speciales* of *Fusarium oxysporum* were examined to identify the specificity of nuclear ribosomal operon regions in Foc TR4 genome.

### RealAmp Assay

The LAMP reaction contained 1.6  $\mu$ M each of FIP and BIP, 0.2  $\mu$ M each of F3 and B3, 12.5  $\mu$ L LAMP reaction buffer containing 1.6 mM dNTPs, 1 M betaine, 8 mM  $\text{MgSO}_4$ , 20 mM Tris-HCl (pH 8.8), 10 mM KCl, 10 mM  $(\text{NH}_4)_2\text{SO}_4$  and 0.1% Triton X-20 (Deao Biotechnology Co., Ltd, Guangzhou, China), 8 U of *Bst* DNA polymerase (New England Biolabs, Ipswich, MA), 0.2  $\mu$ M SYTO-9 fluorescent dye (Invitrogen, Carlsbad, CA), 1  $\mu$ L of template DNA, and double-distilled water to a final volume up to 25  $\mu$ L. Then, an equal volume of paraffin oil was added to the tube to prevent evaporation, followed by adding 1  $\mu$ L of 1:10 dilution SYBR Green I (Invitrogen, Carlsbad, CA) to the inside of the lid prior to amplification with an improved close-tube visual detection system. The RealAmp assay was carried out at 63°C for

90 min using the ESE-Quant Tube Scanner (ESE GmbH, Stockach, Germany), which was set to collect fluorescence signals at 1 min intervals. The ESE-Quant Tube Scanner is a small easy-to-use fluorescence measurement system which has an eight tube holder heating block with adjustable temperature settings and spectral devices to detect amplified product with fluorescent dye [39].

The threshold validation test is used to identify that the signal has increased sufficiently to be deemed positive. During the real-time amplification, the fluorescence data were obtained on the 6-carboxyfluorescein (FAM) channel (excitation at 487 nm and detection at 525 nm), and a fluorescence units threshold value was used, and threshold time ( $T_t$ ) calculated as the time at which the fluorescence equaled the threshold value. The threshold value is 10 times standard deviation of the fluorescence signal during initial 5 minutes. In the plot, the Y-axis denotes the fluorescence units in milli-volts (mV) and the X-axis shows the time in minutes.

After the reaction, the LAMP products were detected directly by visual observation of the solution colour by mixing the pre-added 1  $\mu$ L of SYBR Green I to the reaction solution through gentle centrifugation. Green fluorescence was clearly observed with the naked eye in the positive reaction, whereas the colour remained the original orange in the negative reaction. The RealAmp products (5  $\mu$ L) were analyzed by electrophoresis on a 2% (w/v) agarose gel and subsequently stained with ethidium bromide.

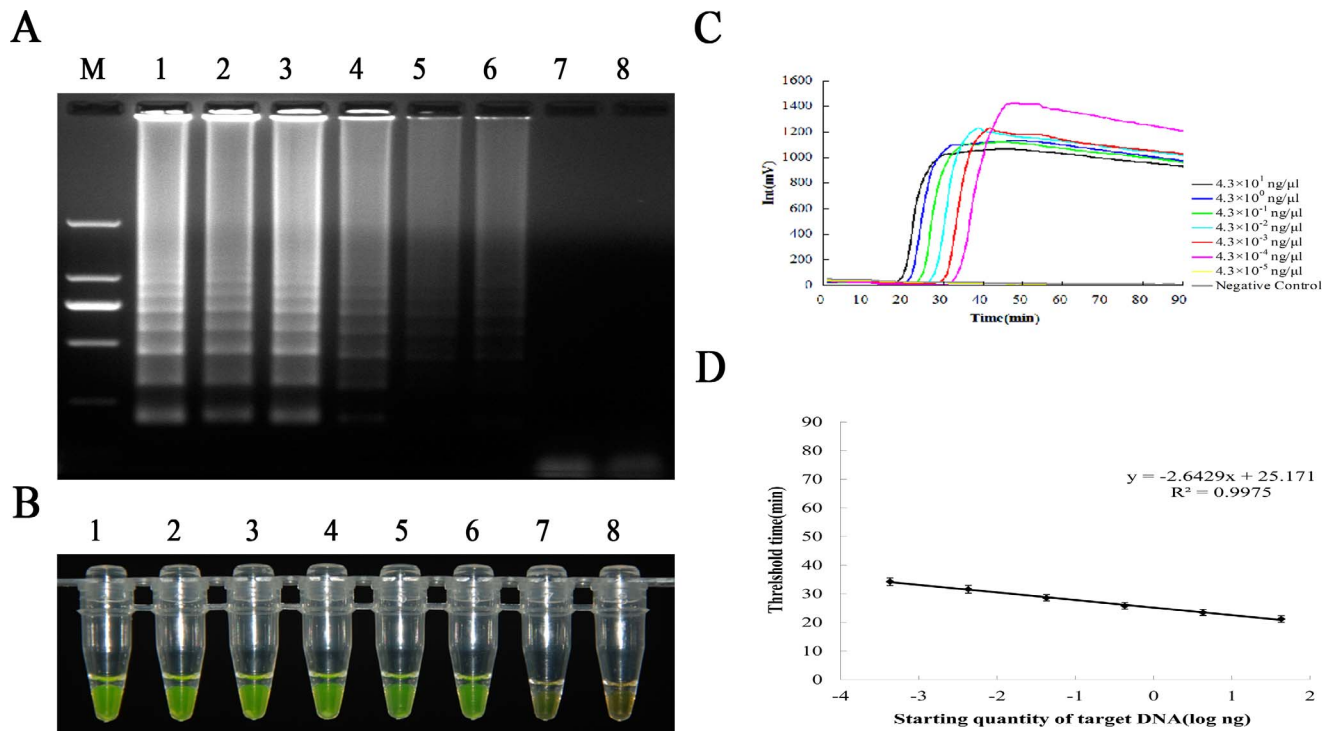

**Figure 3. The sensitivity of RealAmp assay and standard curve.** (A) Sensitivity test of RealAmp assay. Lane M, Trans2K *Plus* II DNA marker, lanes 1–8 correspond to serial 10-fold dilutions of Foc TR4 plasmid DNA ranging from  $4.3 \text{ ng}/\mu\text{l}$  to  $4.3 \times 10^{-5} \text{ ng}/\mu\text{l}$ . Samples given in lanes 1 to 8 in Fig. 3B and 3C is the same as in Fig. 3A. (B) Visual detection of the RealAmp amplification products. The original orange colour of SYBR green turned green in the positive reaction mixture. (C) The fluorescence units vs. time amplification curves plotted automatically using an ESE-Quant Tube Scanner. (D) Standard curve for RealAmp assay. The threshold time ( $T_t$ ) vs. the amount of initial template plasmid DNA were plotted using an ESE-Quant Tuber Scanner. Error bars represent standard deviations from triplicate reactions. doi:10.1371/journal.pone.0082841.g003

### Specificity and Sensitivity Test of RealAmp Assay

To confirm the specificity of the RealAmp assay, the DNAs of other relative fungi, *Mycosphaerella melonis*, *Fusarium oxysporum* f. sp. *cucumerium*, *Fusarium oxysporum* f. sp. *lactucae*, *Fusarium oxysporum* f. sp. *luffae*, *Fusarium oxysporum* f. sp. *cubense* race 1 (Foc1) and subtropical race 4 (ST4) were used in the analyzes. In addition, the smallest fragment from RealAmp amplification products were cloned and sequenced. The specificity was also validated by conventional PCR using the specific primer set FocTR4-F/FocTR4-R previously reported by Dita *et al.* (2010) [42], which produced a 463-bp specific amplified fragment.

To determine the sensitivity of the RealAmp assay, a 463-bp-specific DNA fragment containing the LAMP target region was amplified by PCR using the specific FocTR4-F/FocTR4-R aforementioned primer set. The thermal cycling program consisted of the following steps:  $94^\circ\text{C}$  for 3 min, 35 cycles of  $94^\circ\text{C}$  for 30 s,  $60^\circ\text{C}$  for 30 s  $72^\circ\text{C}$  for 45 s, and a final extension at  $72^\circ\text{C}$  for 7 min. The PCR products were cloned into pMD18-T vector (Takara) according to the manufacturer's instructions. The recombinant plasmid, designated pMD18-T-TR4, was used to make dilutions as a reference for evaluating the detection limits of the RealAmp assay and real-time PCR, respectively.

It is difficult to quantify Foc TR4 genomic DNA in soil samples, thus, the plasmid DNA mixed with soil DNA was used as both RealAmp and real-time PCR references to evaluate the sensitivity. While some inhibitory compounds exist in soil samples, mixing plasmid DNA with extracted soil DNA is a convenient approach to evaluate the detection limit of either RealAmp or real-time PCR. For the RealAmp assay, the pMD18-T-TR4 plasmid DNA

was adjusted to the concentration of  $430 \text{ ng}/\mu\text{l}$ , and diluted into a 10-fold series ( $1 \times 10^0$  to  $1 \times 10^7$  copies) before mixing with extracted soil DNA using a reference to assess the detection limit of the RealAmp assay, in comparison with real-time PCR. The standard curve was constructed according to the serial dilutions of extracted genomic DNA.

### Real-time PCR

The Real-time PCR assay was designed in this study with the SYBR® Premix *Ex Taq*<sup>TM</sup> kit (Takara, Dalian, China) and performed using the PRISM® 7500 Fast Real-Time PCR (Applied Biosystems) in a total volume of 25  $\mu\text{l}$  following the manufacturer's instructions. In this study, The Foc race 4 specific primer set FocSc-1/FocSc-2 (5'-CAGGGGATGTATGAGGAGGC-TAGGCTA/5'-GTGACAGCGTCGTCTAGTTCCTTGGAG) described by Lin *et al.* (2013) was used, which was designed based on a SCAR marker sequence (named as Foc<sub>242</sub>) and have been confirmed to be highly specificity to Foc race 4 [43]. A 10-fold dilution series of plasmid DNA of Foc TR4 standard was analyzed in triplicate using the real-time PCR assay based on Ct values against the amount of plasmid DNA was then plotted to create a standard curve. A standard curve was constructed with eight ten-fold serial dilutions of the pMD18-T-TR4 plasmid DNA with soil DNA solution in triplicate real-time reactions described above. The thermal cycling conditions consisted of an initial denaturation for 5 min at  $95^\circ\text{C}$ , followed by 40 cycles at  $95^\circ\text{C}$  for 15 s annealing at  $60^\circ\text{C}$  for 30 s, extension at  $72^\circ\text{C}$  for 15 s. After the real-time PCR, melting curves ( $65^\circ\text{C}$  to  $99^\circ\text{C}$ ) of the PCR products were analyzed to verify their specificity.

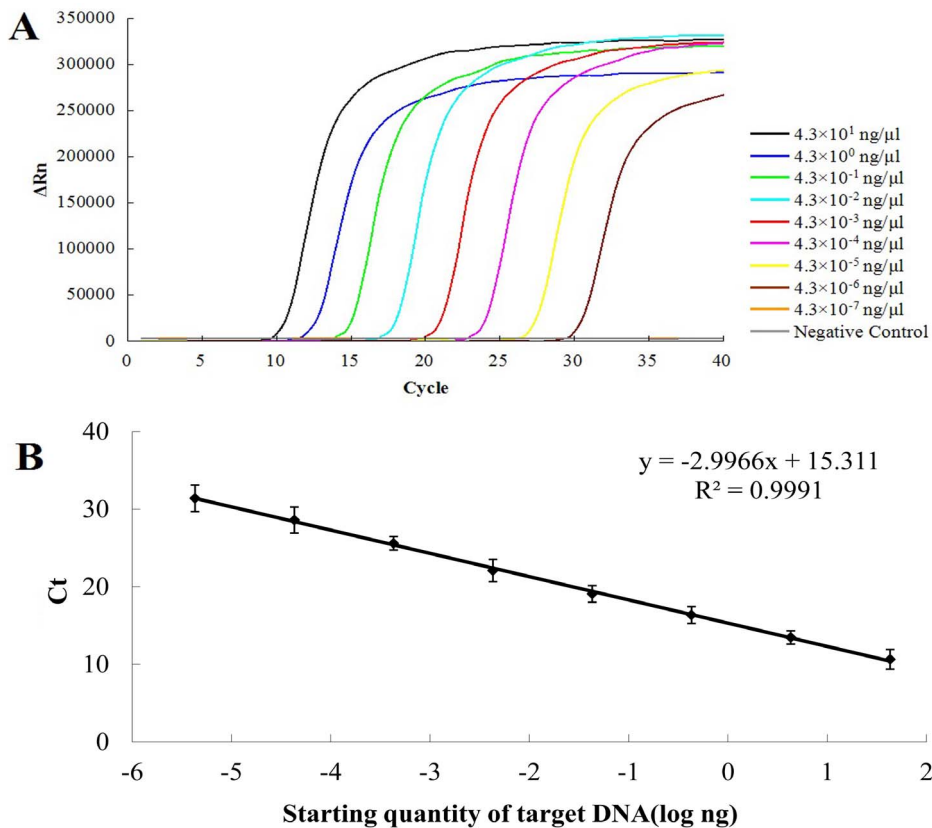

**Figure 4. Determination of the detection limit of the real-time PCR and standard curve.** (A) Sensitivity test of the real-time PCR. The real-time fluorescence units are plotted against concentration of initial plasmid DNA ranging from 4.3 ng/ $\mu$ l to  $4.3 \times 10^{-6}$  ng/ $\mu$ l using a PRISM<sup>®</sup> 7500 Fast real-time PCR. (B) Standard curve calculated from panel A. Standard curve generated using known concentration of 10-fold serially diluted pMD18-T-TR4 plasmid DNA and the threshold cycle (Ct) value. Every DNA concentration was measured 3-fold and error bars represent standard deviations from three replicate reactions.

doi:10.1371/journal.pone.0082841.g004

### Feasibility Test

To investigate the availability of RealAmp assay for the detection of Foc TR4 in field surveys, a systematic survey for Foc TR4 was conducted in a total of 136 field samples in the banana-growing areas from South China in 2010-2011 (Table S1). The field-collected soil samples were quantitatively analyzed with both RealAmp assay and real-time PCR, respectively. All the data was analyzed using SPSS for windows 17.0 (SPSS Inc.). Independent *t*-test and paired *t*-test was used to test the significance between two methods (RealAmp and real-time PCR) at the  $P < 0.05$  level for each sample and all the samples, respectively.

## Results

### Development of RealAmp Assay for the Detection on Foc TR4

The ESE-Tube scanner equipped with temperature settings to amplify DNA isothermally and spectral device to detect amplified product using fluorescence was applied for the detection of Foc TR4 in soil samples. In the specificity test, only amplified products from DNAs of Foc TR4 isolate were detected but not from DNAs of any tested isolates and other *formae speciales* of *F. oxysporum*, showing a high specificity of the designed primer set (Fig. 2A). The results were identical to those tested by specific PCR using the previously described specific primer pair. A single 463-bp product

was amplified only from Foc TR4 isolates and no amplified bands were observed from other pathogens and water control (Fig. 2B). The colour of LAMP products of Foc TR4 isolate changed from orange to green when detected with SYBR Green I, whereas the colour of the other samples remained originally orange (Fig. 2C). The amplification curves obtained using the ESE-Quant tube scanner to monitor the DNA synthesis reaction indicated that the primer set were able to specifically amplify the target DNA sequence (Fig. 2D). Furthermore, the fragment from LAMP product was cloned into the pMD18-T vector and subsequently sequenced. The resulting sequence perfectly matched the sequence of IGS gene of Foc TR4 (data not shown), indicating that the RealAmp primer set was specific for Foc TR4, as no target products were amplified from the other DNAs of pathogens tested.

### Sensitivity and Standard Curve Analysis

For the sensitivity tests, serial dilutions of plasmid DNA mixed with extracted soil DNA were used to evaluate the sensitivity of the newly established RealAmp assay in comparison to the real-time PCR method. The electrophoresis showed that the RealAmp assay could detect as low as about 0.4 pg/ $\mu$ l of plasmid DNA when mixed with extracted soil DNA (Fig. 3A). The colour change of RealAmp products (from orange to green) was clearly observed in a range from 43 ng/ $\mu$ l of plasmid DNA to  $4.3 \times 10^{-4}$  ng/ $\mu$ l plasmid DNA, which was identical to the electrophoresis result (Fig. 3B). This assay represented a standard fluorescence

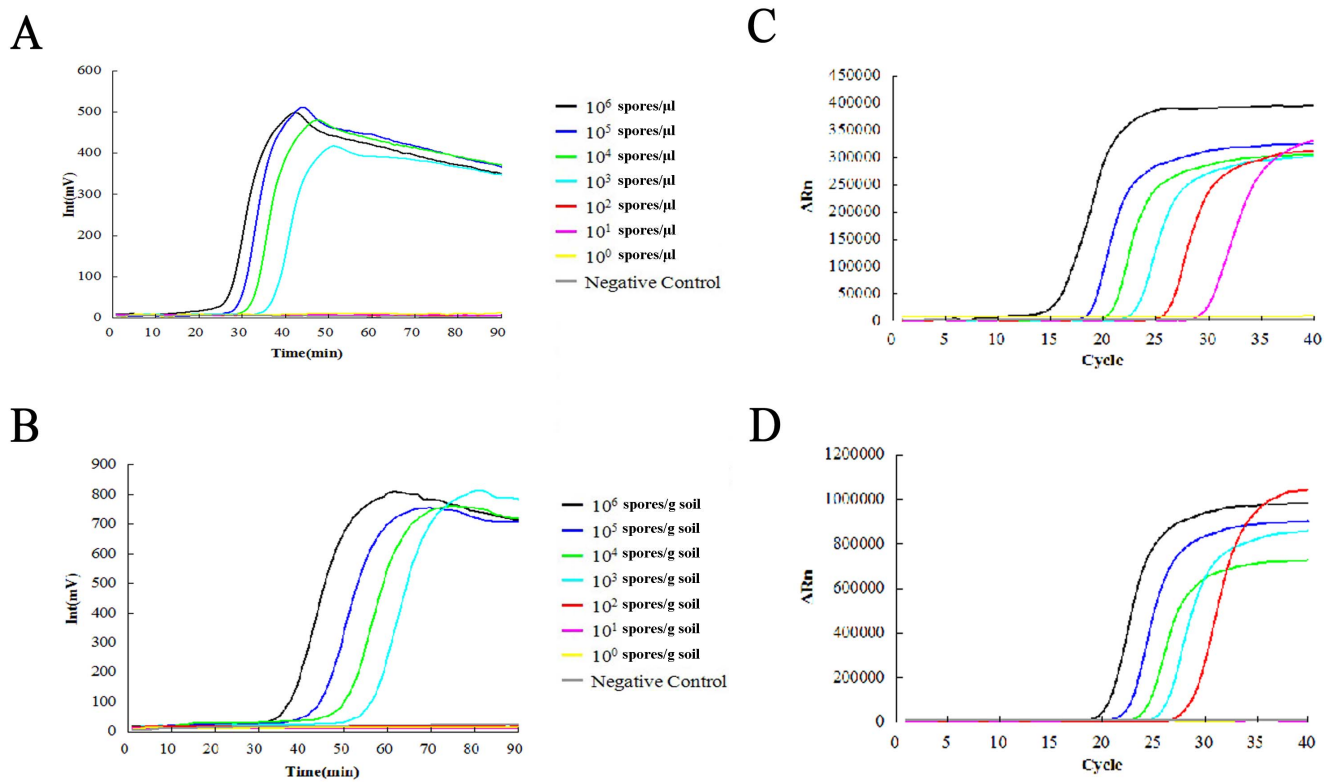

**Figure 5. Detection of Foc TR4 from pure spores and spores in artificially infested soil using RealAmp assay and real-time PCR.** (A) and (B) show detection of Foc TR4 from pure spores, respectively, using RealAmp assay. (C) and (D) show detection of Foc TR4 from artificially infested soil samples, respectively, using real-time PCR. (A) and (C) show the serial 10-fold dilutions of pure spores were ranging from  $10^6$  to  $10^0$  spores/ $\mu$ l. (B) and (D) show the serial 10-fold dilutions of artificially infested soil samples were ranging from  $10^5$  to  $10^0$  spores/g soil. doi:10.1371/journal.pone.0082841.g005

amplification of LAMP products with exponential growth using the ESE-Quant tube scanner (Fig. 3C). There was a good linearity between the threshold time ( $T_t$ ) and the initial amount of template plasmid DNA ( $R^2 > 0.99$ ,  $P < 0.05$ ), confirming that amplification was reliable and the RealAmp assay could be used for pathogen DNA quantification with traditional standard curves, and thus a standard curve between the threshold time ( $T_t$ ) and the amount of initial template plasmid DNA was constructed (Fig. 3D).

Real-time PCR showed amplification of PCR products and regression analysis Ct versus initial template concentrations showed that the resulting standard curve was linear over a concentration range of at least 8 orders of magnitude, with the detection limit of the real-time PCR being approximately  $4.3 \times 10^{-6}$  ng/ $\mu$ l plasmid DNA when mixed with extracted soil DNA (Fig. 4A). The standard curve produced by the real-time PCR assay revealed a good linearity within the detection limit and a high correlation between Ct and DNA quantities ( $R^2 > 0.99$ ,  $P < 0.05$ ) (Fig. 4B). The detection limit of the real-time PCR was about 100-fold higher than that of the RealAmp assay. All the experiments were performed independently for three times ( $n = 3$ ), and nearly identical results were obtained.

#### Artificially Inoculated Soil Samples

Artificially infected soil samples were prepared and the DNA was extracted as mentioned above. No Foc TR4 DNA was detected in the uninoculated control soil samples with either RealAmp assay or real-time PCR. The detection limit of RealAmp assay was  $10^3$  spores/ $\mu$ l from pure spores and  $10^3$  spores/g soil in artificially infested soil, indicating that strand displacement

amplification conferred high tolerance and amplification efficiency for RealAmp assay (Fig. 5A, B). The detection limit of real-time PCR was 10 spores/ $\mu$ l from pure spores and  $10^3$  spores/g soil in artificially infested soil (Fig. 5C, D).

#### Detection in Field Soil Samples

To evaluate the effectiveness of the RealAmp assay for the detection of Foc TR4 in the agricultural soil samples, a total of 136 samples were tested by RealAmp and real-time PCR, respectively. 124 out of 136 samples were infected by Foc TR4. In the remaining 12 samples Foc TR4 was absent according to the RealAmp assay. Results from the real-time PCR assay indicated that 125 samples were positive and 11 samples were negative. The negative samples detected by real-time PCR were also tested negative by RealAmp assay. Only one sample was tested positive in real-time PCR were not detected by RealAmp assay. The detection rate of real-time PCR and RealAmp were 125/136 (91.9%) and 124/136 (91.2%) for the field samples in this study, respectively.

The quantification of Foc TR4 DNA in soil between real-time PCR and RealAmp were statistically analyzed in 6 randomly selected samples with the SPSS software. No significant difference between the RealAmp and real-time PCR were observed based on quantitative results (Paired  $t$ -test,  $P > 0.05$ ) (Table S1, Fig. 6).

#### Discussion

*Fusarium oxysporum* f. sp. *ubense* (Foc), especially tropical race 4 (TR4), is a ubiquitous soil borne pathogen which causes wilt

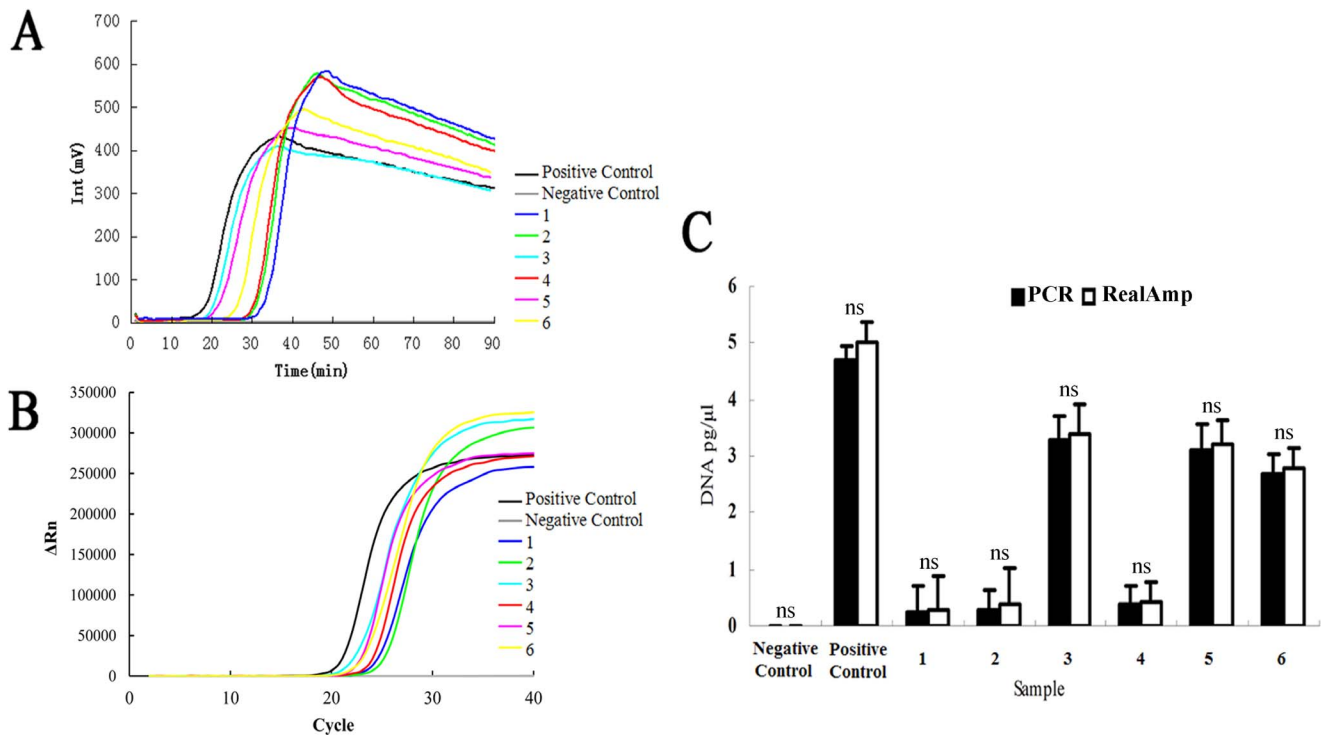

**Figure 6. Detection of Foc TR4 in 6 randomly selected field soil samples using the RealAmp assay and real-time PCR method, respectively.** (A) RealAmp assay detection of random field soil samples. The amplification curves were obtained using the ESE-Quant tube scanner. The graph reports the fluorescence in millivolts (mV) on the y axis and time in minutes on the x axis. Lanes 3 to 8 are random samples collected from different geographic locations, respectively. (B) Real-time PCR method detection of Foc TR4 in 6 randomly selected field soil samples and samples in lanes 3–8 correspond to those in panel (A). (C) Comparison of the quantitative results of 6 randomly selected samples between RealAmp assay and real-time PCR. A twice-autoclaved Foc-free soil sample served as negative control and a Foc TR4 artificially infested soil sample served as positive control in this study, respectively. Data are the mean ( $\pm$ SD) of three replicates. ns above columns indicate no significant difference between two detection methods for each sample at  $P < 0.05$  levels (ns, not significant). Paired t-test was used to test the significance of difference between two methods for all the soil samples at  $P < 0.05$  level. doi:10.1371/journal.pone.0082841.g006

disease on banana (*Musa* spp.) plants. Rapid and reliable detection of the pathogen is essential for undertaking appropriate and timely disease management measures. In recent years, various techniques have been developed to detect Foc-infected banana plant tissue, such as PCR-based methods [40–43] and LAMP assay [44]. However, no assay was developed to detect Foc race 4 in soil, which is a soil-borne pathogen that can survive for decades and cannot be controlled once a banana plant is infected.

In this study, a RealAmp assay was developed for the rapid and quantitative detection of Foc TR4 in soil. There is no requirement for require expensive reagents and equipment, compared with conventional real-time PCR. The ESE-Quant tube scanner provides a major advancement toward “electricity-free” technology for LAMP technology and offers a single-step amplification and product detection step. A portable fluorescent reader equipped with a battery pack (ESE-Quant Tube Scanner) is sufficient to run a RealAmp assay. The RealAmp assay we developed is the foundation of integrated disease management practice and can guide banana growers before planting and avoid further dissemination of Foc TR4.

The RealAmp assay is highly specific because it uses four primers that recognize six regions on the target DNA. The LAMP reaction is considered to progress through two steps by DNA polymerase with strand displacement activity: the starting structure producing step and the cycling amplification step. The outer primers, F3 and B3, recognize one of the six sites each and prime amplification of the entire region in a non-cycling manner. The

inner primers, FIP and BIP, each recognize two of the six sites within the amplified sequence of the primer pair and form a dumbbell-like DNA structure used for subsequent cycling amplification. The LAMP prime set used in this study is a compromising consideration between detection specificity and amplification efficiency. On the one hand, the higher SNP frequency of the IGS region provides a rich source of genetic diversity in Foc, which was successfully exploited to develop a Foc TR4 specific PCR detection method by Dita *et al.* (2010) [42], and the designed FocTR4-F/FocTR4-R primer set used as outer primer in this study for the consideration of specificity. On the other hand, the outer primer set used in this study could amplify the Foc TR4 specific target IGS region and subsequently initiate the LAMP reaction, and the LAMP reaction processed at a constant temperature by one type of enzyme, the distance of outer primer from F2/B2 regions has no significant effect on amplification efficiency. Only amplified products from DNAs of Foc TR4 isolates showed ladder-like bands, while no amplicons were detected from DNAs of other tested *formae specialis* of *F. oxysporum* and from the DNA-free control. Accordingly, the ESE-Quant Tube Scanner to monitor the DNA synthesis reaction using SYTO-9 fluorescence also indicated the primer set was specific to amplify the target DNA sequence. Additionally, the sequences of the smallest fragment amplified from field samples had a 100% sequence identity to the IGS region of Foc TR4 in GenBank (accession number FJ985561, data not shown). These results indicated this RealAmp assay was highly specific for diagnosis of Foc TR4.



Since *F. oxysporum* is a soil-borne pathogen, it is difficult to extract pure genomic DNA from spores to use as a standard. Therefore, the amount of pathogen DNA was quantified using a standard curve generated by including reactions containing different amounts of a plasmid carrying the Foc TR4 target sequence. While some inhibitory compounds exist in soil, mixing plasmid DNA with extracted soil DNA is a convenient approach to evaluate the detection limit of either RealAmp assay or real-time PCR. Thus, the plasmid DNA diluted with DNA extracted from twice-autoclaved soil was used as both RealAmp and real-time PCR references to evaluate the sensitivity of the Foc TR4. The RealAmp assay could detect as low as 0.4 pg/ $\mu$ l plasmid DNA mixed with soil DNA, which was 100 times lower than that of real-time PCR. Accordingly, the detection limit of real-time PCR was about 100-fold higher than that of RealAmp assay in pure spores. However, RealAmp assay with nearly same detection limit with real-time PCR for artificially infested soil, indicating the LAMP-based assay has an increased tolerance of inhibitory substances, compared with PCR-based methods [47]. The increased tolerance to inhibitors also conferred a greater efficiency and convenience of the RealAmp assay for field surveys.

The RealAmp assay is a simple and accurate method for quantifying pathogen DNA in soil samples. Among 136 field-collected samples, quantitative results of 6 randomly selected field soil samples between RealAmp assay and real-time PCR method are shown in fig. 6 for demonstration of the usefulness of the newly established RealAmp assay (Fig. 6). Furthermore, the amount of DNA in a total of 136 soil samples were tested using both the RealAmp assay and real-time PCR method are shown in the Supplementary table 1, and no significant difference was found between two methods in quantifying the pathogen DNA in soil samples collected from the field (Paired test,  $P > 0.05$ ).

It is worth noting that two different intercalating fluorescent dyes in one assay in this study. In some studies, SYBR Green I was shown to have an inhibitory effect on enzymatic DNA amplification when used in a high concentration, and thus SYTO-9

fluorescent dye is a better choice than SYBR Green I for RealAmp assay [48]. However, the rapid and unambiguous visual inspection of LAMP results is essential for diagnostic and discrimination of positive samples in field. Then, an improved closed-tube visual inspection was achieved by addition of 1  $\mu$ l SYBR Green I to the inside of the lid of the amplification tube prior to start of the reaction. After reaction, the SYBR Green I was added to LAMP reaction solution by gentle centrifugation at about 500 g for 10 s. Furthermore, the risk of cross-contamination is minimal using the improved closed-tube visual detection system, which facilitates rapid screening of samples without the use of gel electrophoresis or a fluorescence reader and would be helpful for high-throughput application. Moreover, the RealAmp assay had a high tolerance to inhibitors of DNA from soil samples. It would be a simple and effective approach for the quantitative detection and monitoring of Foc TR4 in soil avoiding further dissemination of Foc TR4 and would be useful for a routine soil-borne detection service in South China.

## Supporting Information

**Table S1 Quantification of 136 soil samples by RealAmp assay and real-time PCR method, respectively. Data are the mean ( $\pm$ SD) of three replicates.**  
(XLS)

## Acknowledgments

We thank Prof. S. Bentley (Centre for Molecular Biotechnology, Queensland University of Technology, Australia) for providing the subtropical race 4 isolate.

## Author Contributions

Conceived and designed the experiments: J. Peng. Performed the experiments: XZ HZ. Analyzed the data: J. Pu YQ. Contributed reagents/materials/analysis tools: QY XX. Wrote the paper: J. Peng.

## References

- Snyder W, Hanson H (1940) The species concept in *Fusarium*. *Am J Bot* 27: 64–67.
- Fourie G, Steenkamp ET, Ploetz RC, Gordon TR, Viljoen A (2011) Current status of the taxonomic position of *Fusarium oxysporum* *formae specialis cubense* within the *Fusarium oxysporum* complex. *Infect Genet Evol* 11(3): 533–542.
- Ploetz RC (2006) *Fusarium* wilt of banana is caused by several pathogens referred to as *Fusarium oxysporum* f. sp. *cubense*. *Phytopathology* 96, 653–656.
- Waiter BH, Stover RH (1960) Studies on *Fusarium* wilt of bananas: VI. Variability and cultivar concept in *Fusarium oxysporum* f. sp. *cubense*. *Can J Bot* 38: 985–994.
- Moore NY, Bentley S, Pegg KG, Jones DR (1995) *Fusarium* wilt of banana. *Musa* Disease Fact Sheet no. 5, International Network for the Improvement of Banana and Plantain, Montpellier, France.
- Ploetz RC (2009) *Fusarium* wilt: the banana disease that refuses to go away. In: Proceedings of International ISHS/Pro Musa Banana Symposium (pp.1–8). Guangzhou, China.
- Su HJ, Hwang SC, Ko WH (1986) Fusarial wilt of Cavendish bananas in Taiwan. *Plant Dis* 70: 814–818.
- Ploetz RC, Herbert J, Sebasigari K, Hernandez JH, Pegg KG, et al. (1990) Importance of *Fusarium* wilt in different banana growing regions. In R.C. Ploetz (Ed.), *Fusarium* wilt of banana (pp. 9–26). St. Paul, MN: American Phytopathological Society.
- Pegg KG, Moore NY, Soerensen S (1993) *Fusarium* wilt in the Asian Pacific region. In R.V. Valmayor, S.C. Hwang, R.C. Ploetz, S.W. Lee, N.V. Roa (Eds.), *Recent developments in banana cultivation techniques*. Proceedings of the International Symposium (pp. 255–269). Los Banos, Laguna, Philippines: International Network for the Improvement of Banana and Plantain/The Asia and Pacific Network (INIBAP/ASPNET).
- Pegg KG, Moore NY, Soerensen S (1994) Variability in populations of *Fusarium oxysporum* f. sp. *cubense* from the Asia/Pacific region. In D.R. Jones (Eds.), *The improvement and testing of Musa: a global partnership*. Proceedings of the First Global Conference of the International Musa Testing Program (pp.70–82). Honduras: FHIA.
- Bentley S, Pegg KG, Moore NY, Davis RD, Buddenhagen IW (1998) Genetic variation among vegetative compatibility groups of *Fusarium oxysporum* f. sp. *cubense* analysed by DNA fingerprinting. *Phytopathology* 88: 1283–1288.
- Buddenhagen IW (2009) Understanding strain diversity in *Fusarium oxysporum* f. sp. *cubense* and history of introduction of ‘tropical race 4’ to better manage banana production. In: Jones D, Van Den Bergh I, (eds.) Proceedings of the International Symposium on Recent Advances in Banana Crop Protection for Sustainable Production and Improved Livelihoods. White River, South Africa. ISHS Acta Horticulturae 828: 193–204.
- Qi PK (2001) Status report of banana *Fusarium* wilt disease in China. In A.B. Molina, N.H. Nasdek, & K.W. Liew (Eds.), *Banana fusarium wilt management: toward sustainable cultivation* (pp. 119–120). Los Banos, Philippines: INIBAP-ASPNET.
- Li MH, Yang B, Leng Y, Chao CP, Liu JM, et al. (2011) Molecular characterization of *Fusarium oxysporum* f. sp. *cubense* race 1 and 4 isolates from Taiwan and Southern China. *Can J Plant Pathol* 33(2): 168–178.
- Hwang SC, Ko WH (2004) Cavendish banana cultivars resistant to *Fusarium* wilt acquired through somaclonal variation in Taiwan. *Plant Dis* 88: 580–588.
- Paul JY, Becker DK, Dickman MB, Harding RM, Khanna HK, et al. (2011) Apoptosis-related genes confer resistance to *Fusarium* wilt in transgenic ‘Lady Finger’ bananas. *Plant Biotechnol J* 9: 1141–1148.
- Yip MK, Lee SW, Su KC, Lin YH, Chen TY, et al. (2011) An easy and efficient protocol in the production of *pflp* transgenic banana against *Fusarium* wilt. *Plant Biotechnol Rep* 5: 245–254.
- Molina AB, Fabregar E, Sinohin VG, Yi G, Viljoen A (2009) Recent occurrence of *Fusarium oxysporum* f. sp. *cubense* tropical race 4 in Asia. *Acta Hort* 828: 109–116.
- Cullen DW, Lees AK, Toth IK, Duncan JM (2001) Conventional PCR and real-time quantitative PCR detection of *Helminthosporium solani* in soil and on potato tubers. *Eur J Plant Pathol* 107: 387–398.
- Cullen DW, Lees AK, Toth IK, Duncan JM (2002) Detection of *Colletotrichum coccodes* from soil and potato tubers by conventional and quantitative real-time PCR. *Plant Pathol* 51: 281–292.

21. Brierley JL, Stewart JA, Lees AK (2009) Quantifying potato pathogen DNA in soil. *Appl Soil Ecol* 41: 234–238.
22. Schroeder KL, Okubara PA, Tambong JT, Lé vesque CA, Paulitz TC (2006) Identification and quantification of *Pythium* species from soils in eastern Washington using real-time polymerase chain reaction. *Phytopathology* 96: 637–647.
23. Ratti C, Budge G, Ward L (2004) Detection and relative quantification of *soil-borne cereal mosaic virus* (SBCMV) and *Polymyxa graminis* in winter wheat using real-time PCR (TaqMan®). *J Virol Methods* 122: 95–103.
24. Lees AK, Cullen DW, Sullivan L (2002) Development of conventional and quantitative real-time PCR assays for the detection and identification of *Rhizoctonia solani* AG-3 in potato and soil. *Plant Pathol* 51: 293–302.
25. Bilodeau G, Uribe P, Koike ST, Martin F (2010) Quantification and rapid detection of *Verticillium dahliae* in soil. *Phytopathology* 100 (Suppl.): S14.
26. Lees AK, Sullivan L, Lynott JS, Cullen DW (2012) Development of a quantitative real-time PCR assay for *Phytophthora infestans* and its applicability to leaf, tuber and soil samples. *Plant Pathol* 61: 867–876.
27. Wallenhammar AC, Almquist C, Söderström M, Jonsson A (2012) In-field distribution of *Plasmodiophora brassicae* measured using quantitative real-time PCR. *Plant Pathol* 61: 16–28.
28. Inami K, Yoshioka C, Hirano Y, Kawabe M, Tsushima S, et al. (2010) Real-time PCR for differential determination of the tomato wilt fungus, *Fusarium oxysporum* f. sp. *lycopersici*, and its races. *J Gen Plant Pathol* 76: 116–121.
29. Notomi T, Okayama H, Masubuchi H, Yonekawa T, Watanabe K, et al. (2000) Loop-mediated isothermal amplification of DNA. *Nucleic Acids Res* 28: e63.
30. Nagamine K, Watanabe K, Ohtsuka K, Hase T, Notomi T (2001) Loop-mediated isothermal amplification reaction using a non-denatured template. *Clin Chem* 47: 1742–1743.
31. Goto M, Honda E, Ogura A, Nomoto A, Hanaki K (2009) Colorimetric detection of loop-mediated isothermal amplification reaction by using hydroxyl naphthol blue. *BioTechniques* 46: 167–172.
32. Zoheir KM, Allam AA (2011) A rapid improved method for sexing embryo of water buffalo. *Theriogenology* 76: 83–87.
33. Tomita N, Mori Y, Kanda H, Notomi T (2008) Loop-mediated isothermal amplification (LAMP) of gene sequences and simple visual detection of products. *Nature Protoc* 3: 877–882.
34. Mori Y, Nagamine K, Tomita N, Notomi T (2001) Detection of loop-mediated isothermal amplification reaction by turbidity derived from magnesium pyrophosphate formation. *Biochem Biophys Res Commun* 289: 150–154.
35. Mori Y, Kitao M, Tomita N, Notomi T (2004) Real-time turbidimetry of LAMP reaction for quantifying template DNA. *J Biochem Biophys Methods* 59: 145–157.
36. Tomlinson JA, Dickinson MJ, Boonham N (2010) Detection of *Botrytis cinerea* by loop-mediated isothermal amplification. *Lett Appl Microbiol* 51: 650–657.
37. Bekele B, Hodgetts J, Tomlinson J, Boonham N, Nikolic P, et al. (2011) Use of a real-time LAMP isothermal assay for detecting 16SrII and 16SrXII phytoplasmas in fruit and weeds of the Ethiopian Rift Valley. *Plant Pathol* 60: 345–355.
38. Lucchi NW, Demas A, Narayanan J, Sumari D, Kabanyanyi A, et al. (2010) Real-time fluorescence loop mediated isothermal amplification for the diagnosis of malaria. *PLoS ONE* 5(10): e13733.
39. Njiru ZK, Yeboah-Manu D, Stinear TP, Fyfed JAM (2012) Rapid and sensitive detection of *Mycobacterium ulcerans* by use of a Loop-mediated isothermal amplification test. *J Clin Microbiol* 50(5): 1737.
40. Lin YH, Chang JY, Liu ET, Chao CP, Huang JW, et al. (2009) Development of a molecular marker for specific detection of *Fusarium oxysporum* f. sp. *cubense* race 4. *Eur J Plant Pathol* 123: 353–365.
41. Lin YH, Chen KS, Chang JY, Wan YL, Hsu CC, et al. (2010) Development of the molecular methods for rapid detection and differentiation of *Fusarium oxysporum* and *F. oxysporum* f. sp. *niveum* in Taiwan. *New Biotechnol* 27: 409–418.
42. Dita MA, Waalwijk C, Buddenhagen IW, Souza Jr MT, Kema GHJ (2010) A molecular diagnostic for tropical race 4 of the banana fusarium wilt pathogen. *Plant Pathol* 59: 348–357.
43. Lin YH, Su CC, Chao CP, Chen CY, Chang CJ, et al. (2013) A molecular diagnosis method using real-time PCR for quantification and detection of *Fusarium oxysporum* f. sp. *cubense* race 4. *Eur J Plant Pathol* 135: 395–405.
44. Li B, Du J, Lan C, Liu P, Weng Q, et al. (2013) Development of a loop-mediated isothermal amplification assay for rapid and sensitive detection of *Fusarium oxysporum* f. sp. *cubense* race 4. *Eur J Plant Pathol* 135: 903–911.
45. Ophel-Keller K, McKay A, Hartley D, Herdina, Curran J (2008) Development of routine DNA-based testing service for soilborne diseases in Australia. *Australasian Plant Pathol* 37: 243–253.
46. Li S, Hartman GL (2003) Molecular detection of *Fusarium solani* f. sp. *glycines* in soybean roots and soil. *Plant Pathol* 52: 74–83.
47. Kaneko H, Kawana T, Fukushima E, Suzutani T (2007) Tolerance of loop-mediated isothermal amplification to a culture medium and biological substances. *J Biochem Biophys Methods* 70: 499–501.
48. Eischeid AC (2011) SYTO dyes and EvaGreen outperform SYBR Green in real-time PCR. *BMC Res Notes* 4: 263.
